# Supplementary figures and images for: Dynamic coefficient symmetric polynomial-based secure key management scheme for Internet of Things (IoT) networks
Source: PeerJ journal article supplement (doi:10.7717/peerj-cs.1726), 2023-12-15

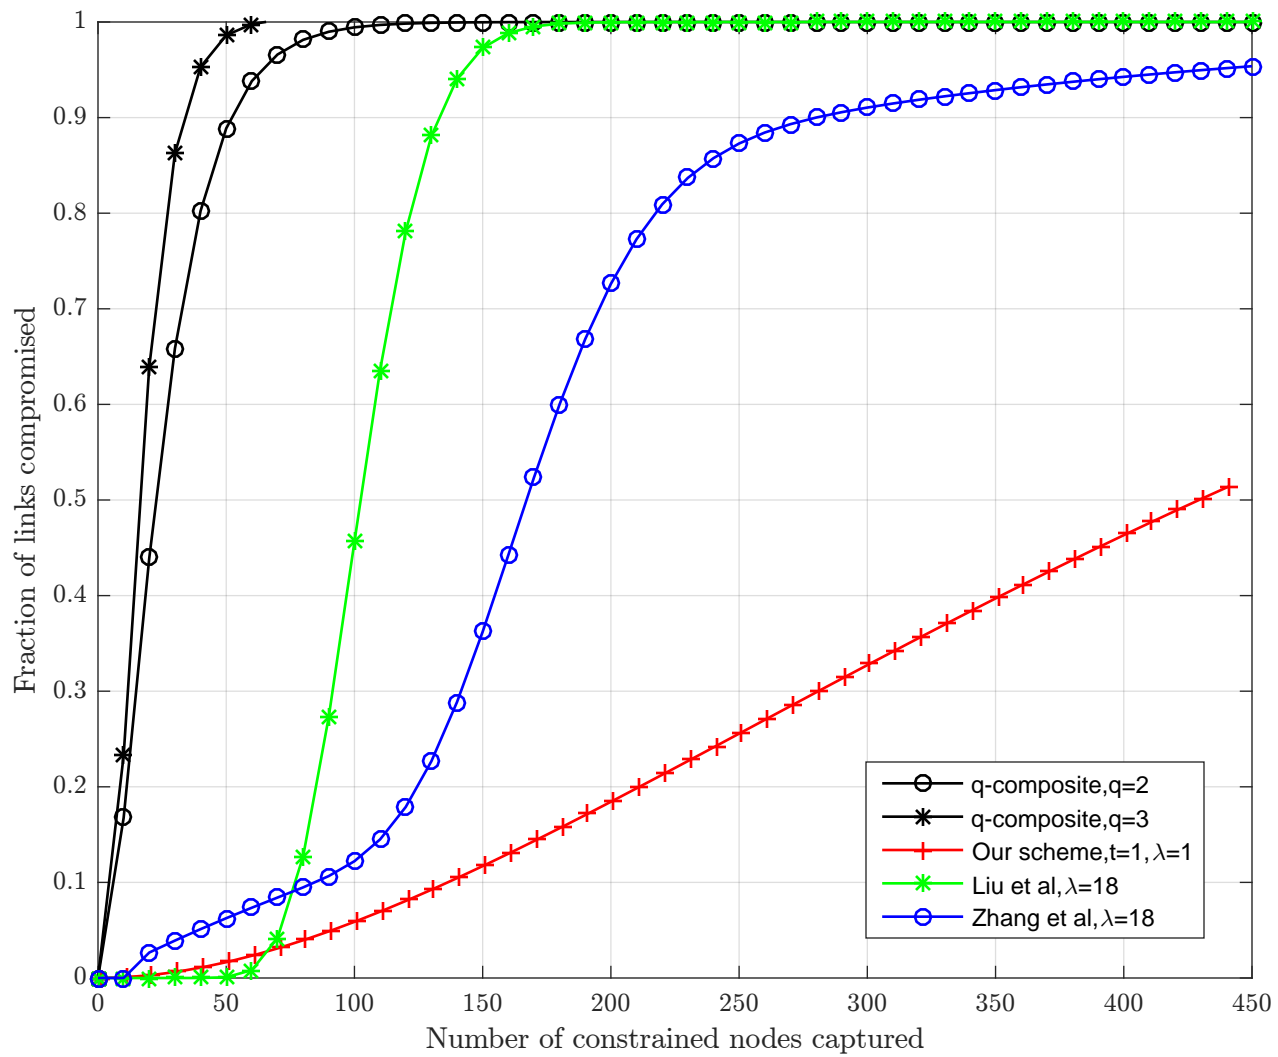

Supplement: Scripts.zip [file Scripts.zip]

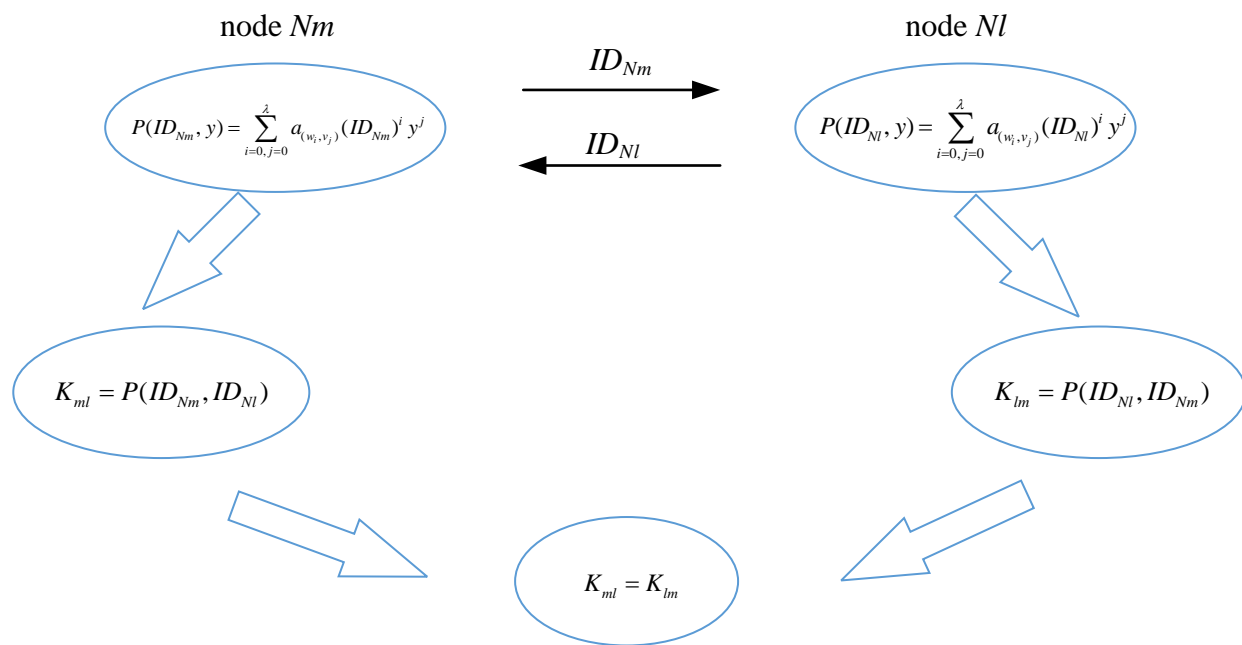

Supplement: Scripts.zip [file Scripts.zip]

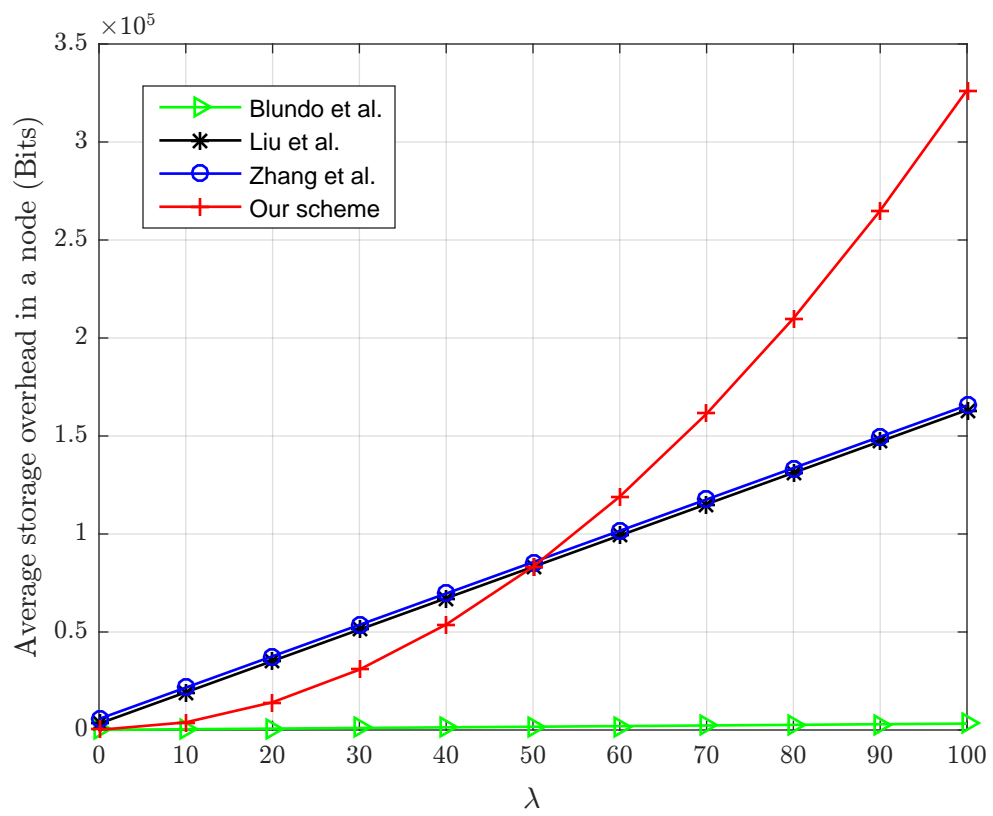

Supplement: Scripts.zip [file Scripts.zip]

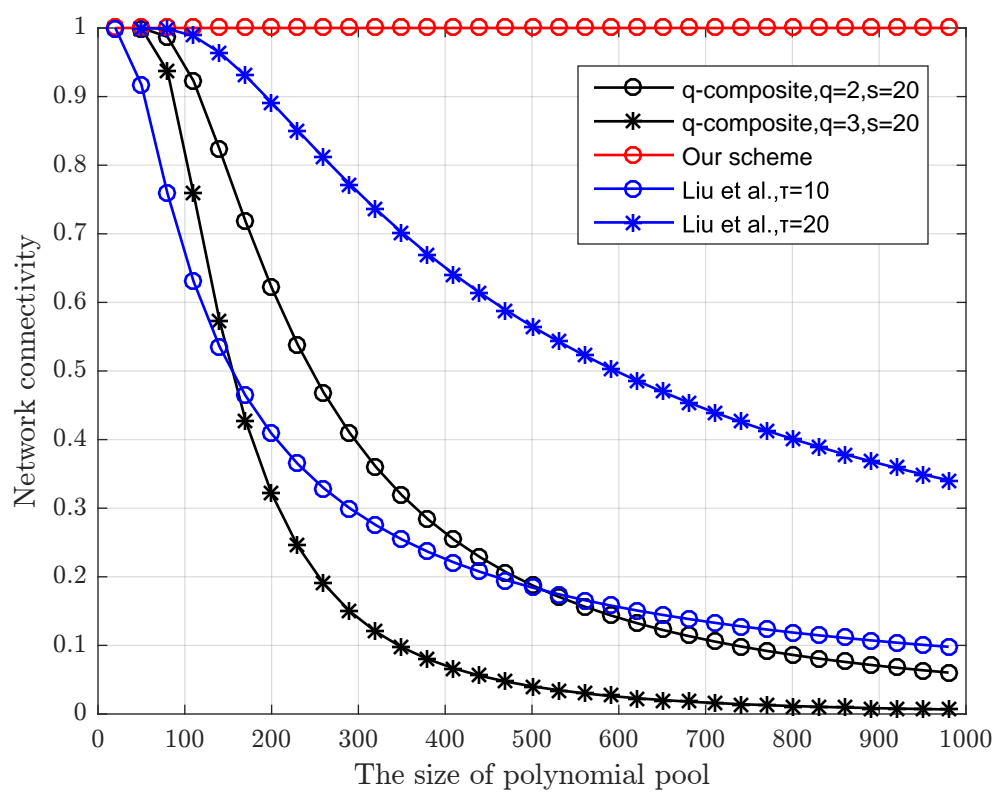

Supplement: Scripts.zip [file Scripts.zip]

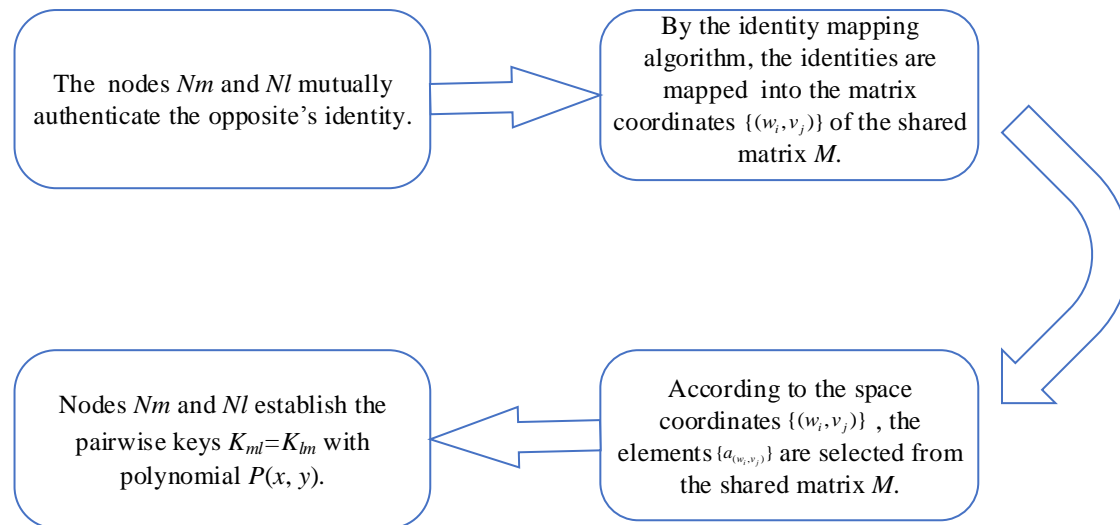

Supplement: Scripts.zip [file Scripts.zip]

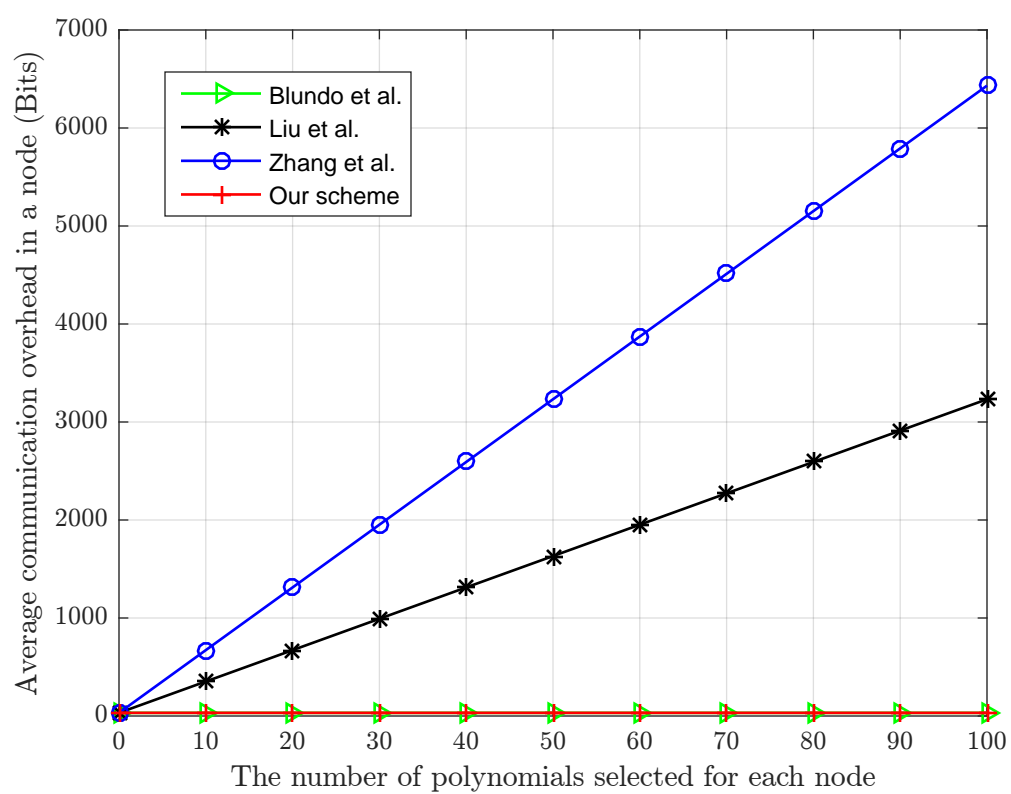

Supplement: Scripts.zip [file Scripts.zip]

Remote Server Nodes

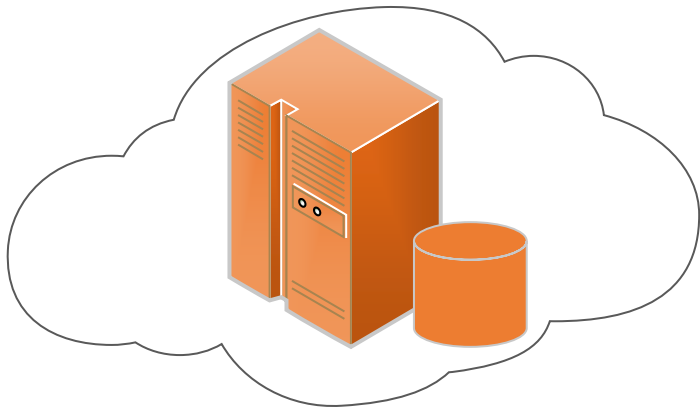

Gateway Nodes

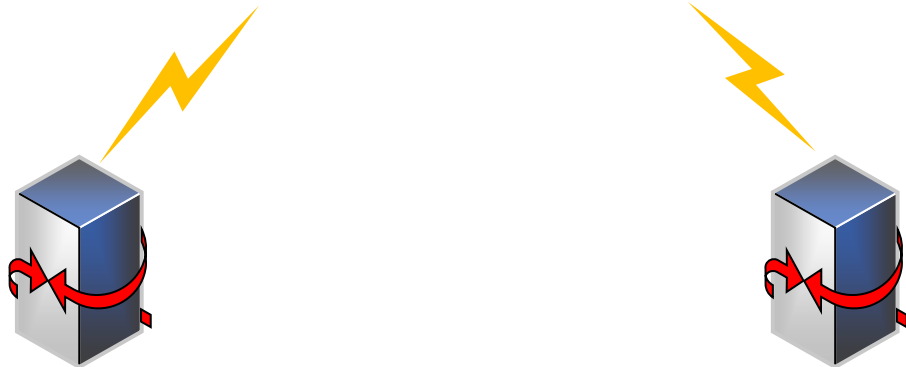

Constrained Nodes

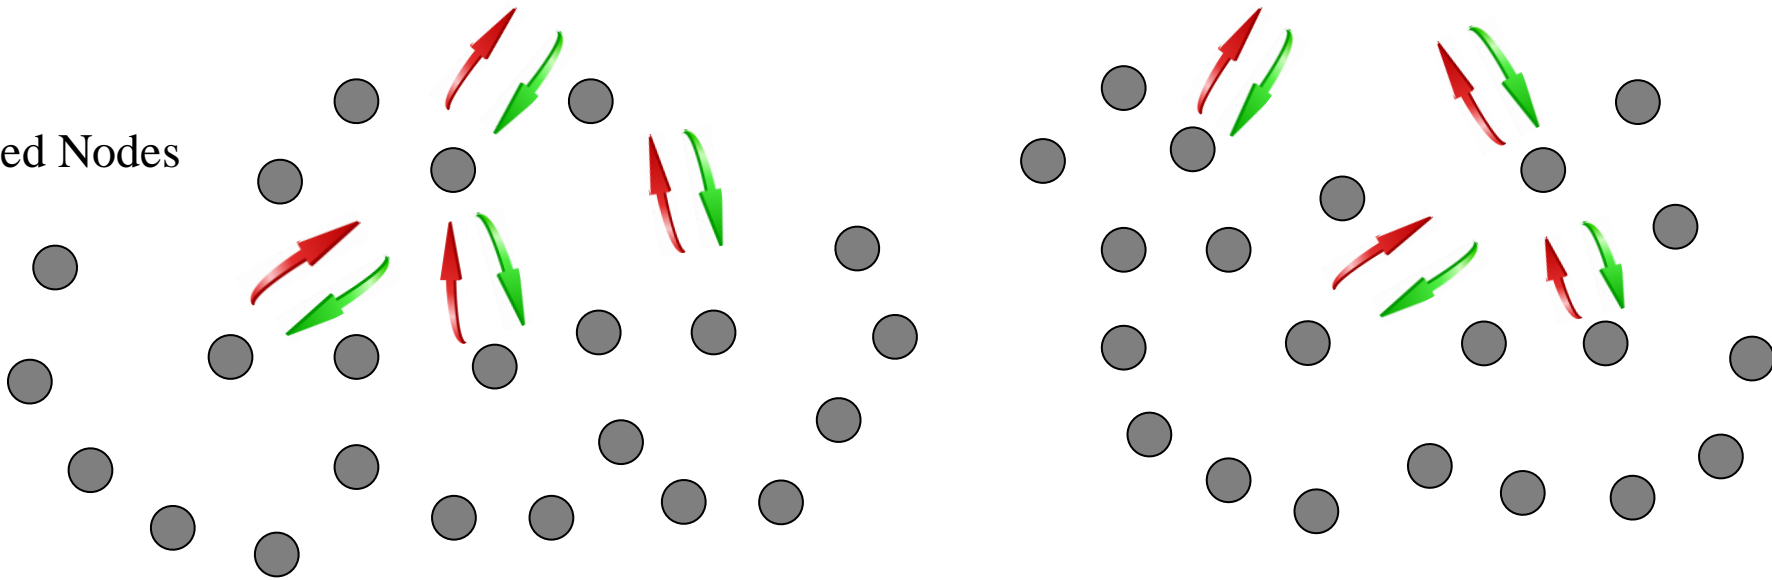

Supplement: Scripts.zip [file Scripts.zip]

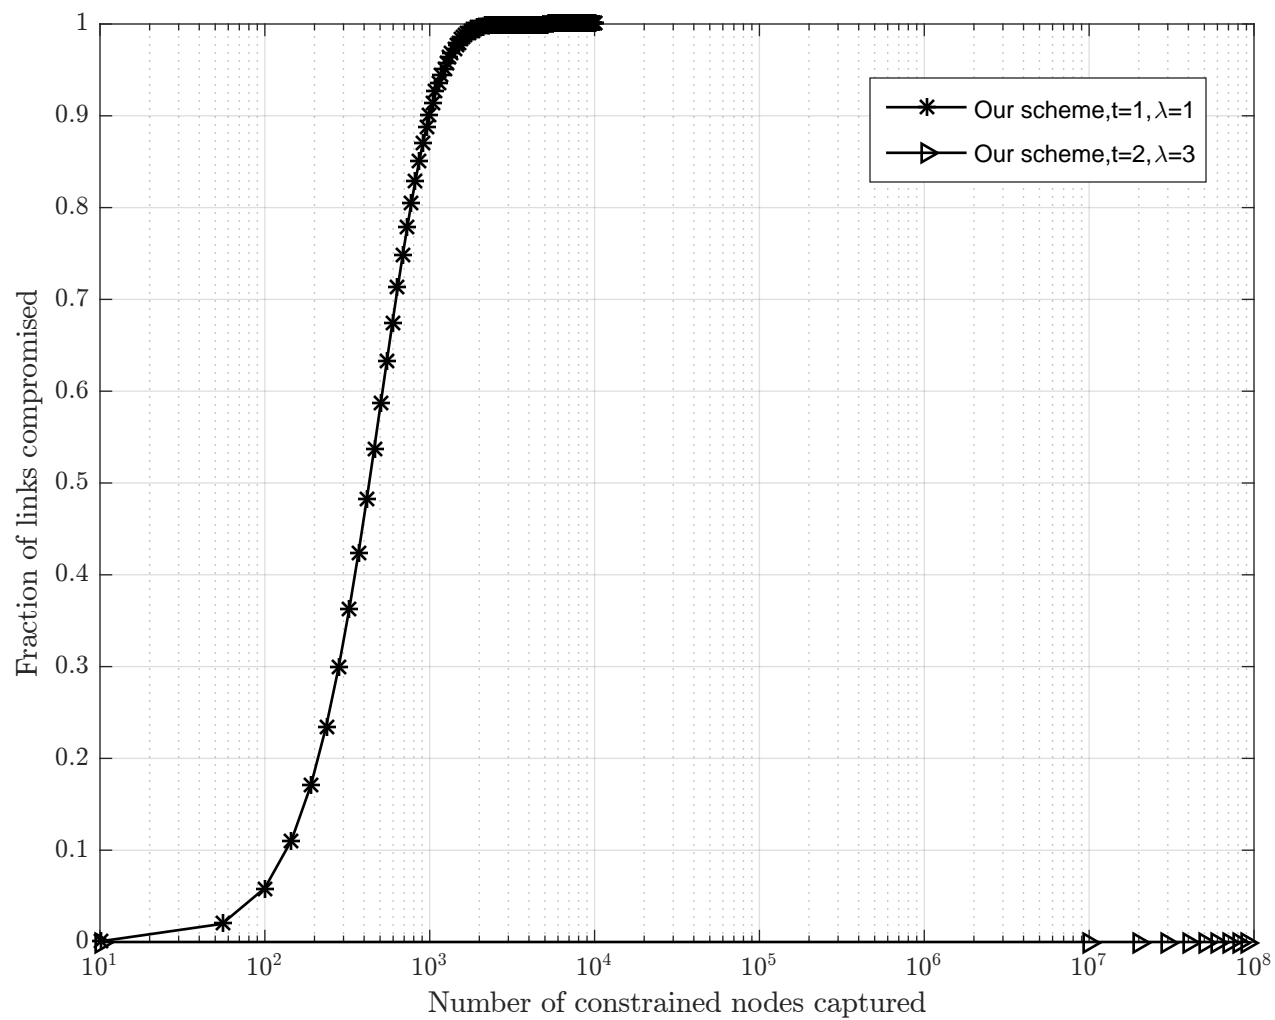

Supplement: Scripts.zip [file Scripts.zip]

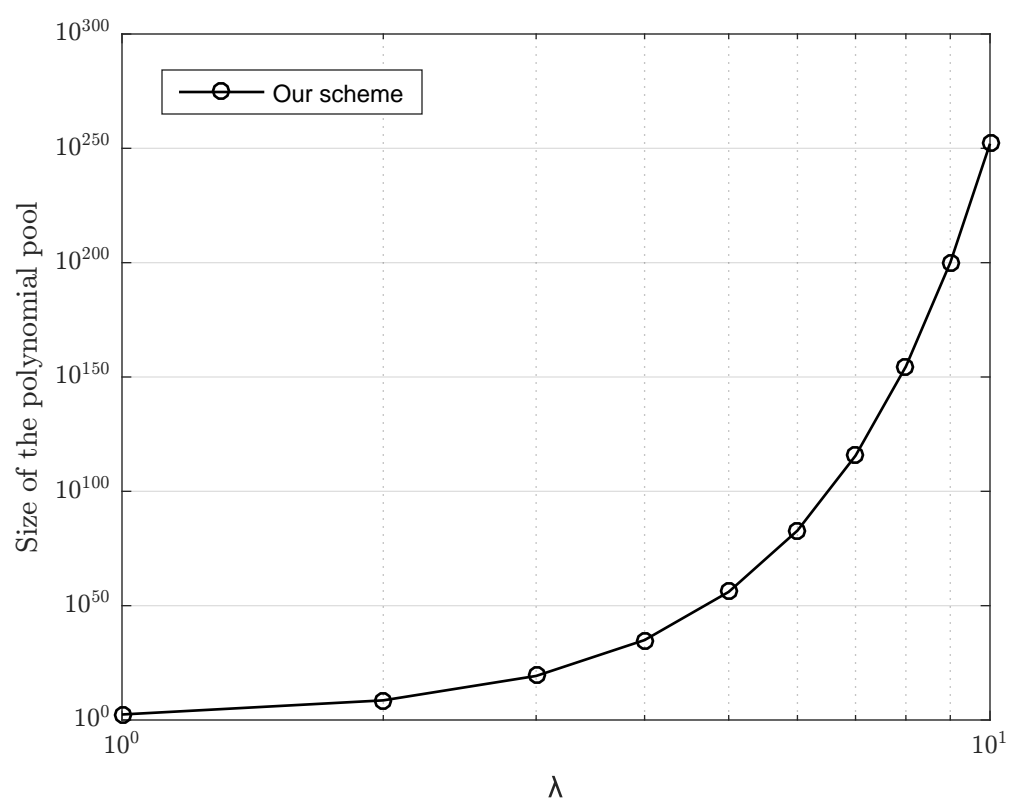

Supplement: Scripts.zip [file Scripts.zip]

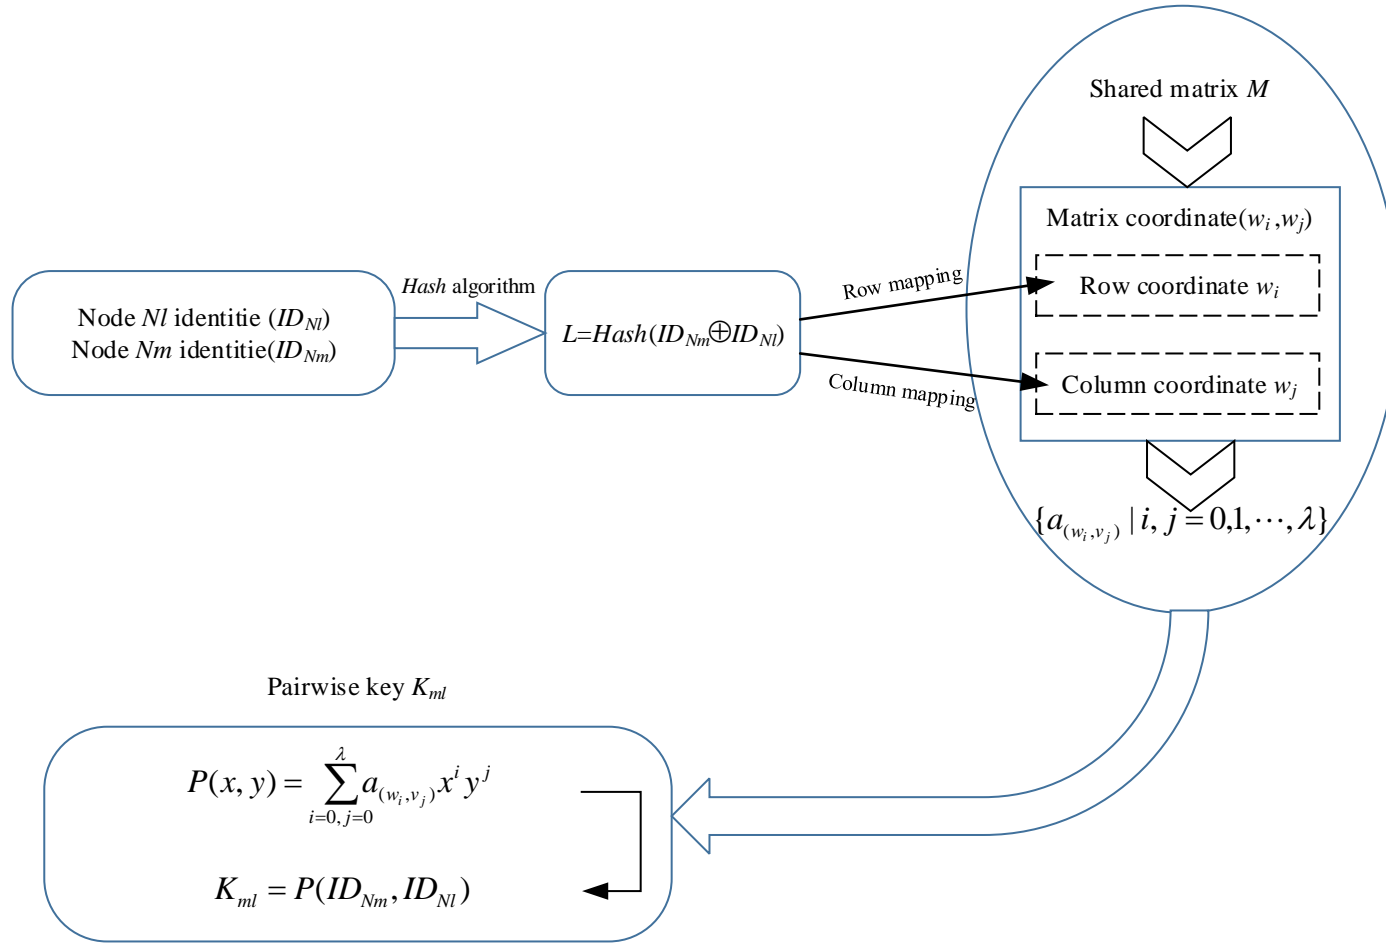

Supplement: Scripts.zip [file Scripts.zip]
